# Supplementary material for: Arrayed CRISPR screen with image-based assay reliably uncovers host genes required for coxsackievirus infection
Source: PubMed Central journal article supplement — Genome Res. 2018 Jun;28(6):859–68. doi: 10.1101/gr.230250.117 (PMC5991512; doi:10.1101/gr.230250.117), 2018-06

**Supplemental Fig S1. GeCKO library screens for CVB3 resistance.** (A) Schematic presentation of the GeCKO library screen. (B) Sequencing analysis of surviving cells. Each circle represents a gene. The y axis indicates the MAGeCK gene score. Genes were randomly distributed on the x-axis. Red colored circle indicates the enriched *CXADR* gene. Purple colored circles indicate eight gene hits in the arrayed screen in the order, *ACBD3*, *ADCY8*, *CSDE1*, *DNM2*, *FASN*, *RACK1*, *OSBP*, and *SACM1L*.

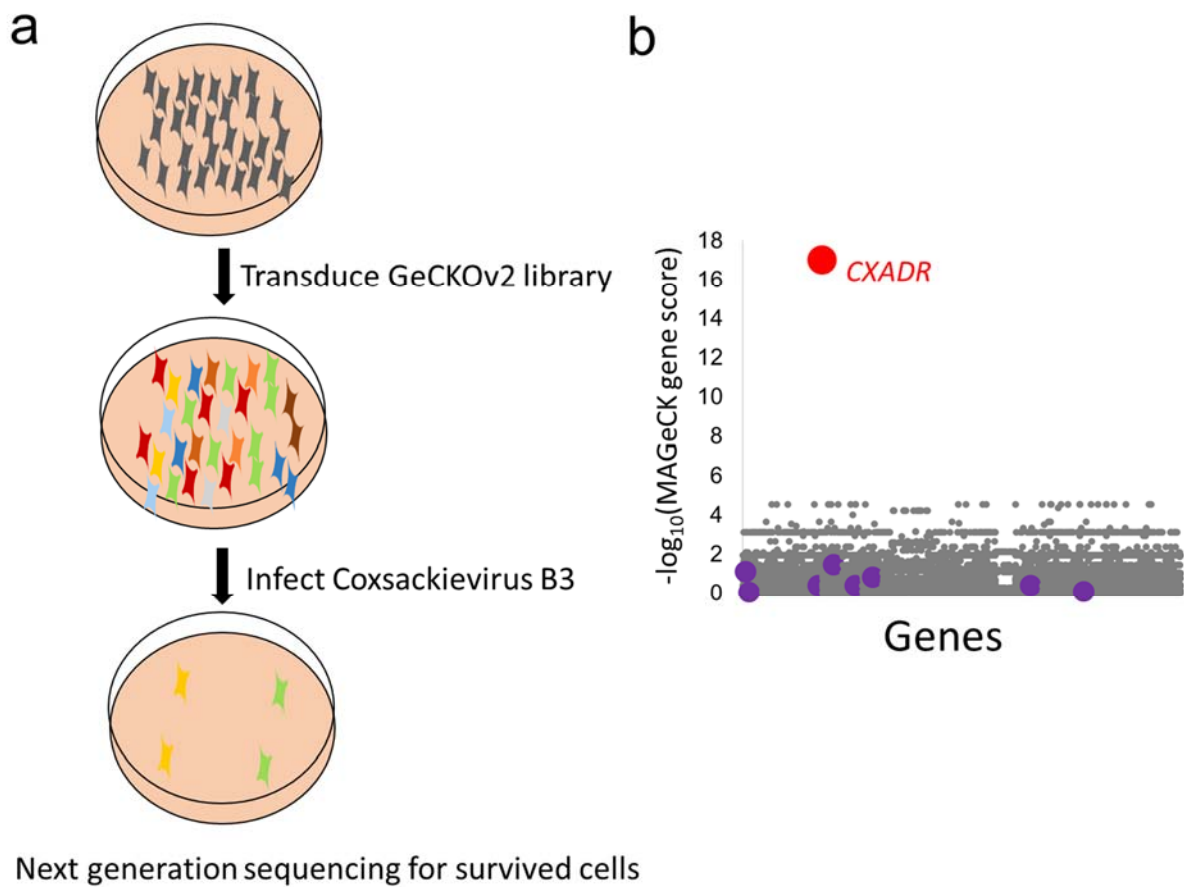

Supplement: supp_gr.230250.117_Supplemental_Fig_S1.pdf [file supp_gr.230250.117_Supplemental_Fig_S1.pdf]
