# Supplementary material for: Arrayed CRISPR screen with image-based assay reliably uncovers host genes required for coxsackievirus infection
Source: PubMed Central journal article supplement — Genome Res. 2018 Jun;28(6):859–68. doi: 10.1101/gr.230250.117 (PMC5991512; doi:10.1101/gr.230250.117), 2018-06
Supplement: supp_gr.230250.117_Supplemental_Fig_S2.pdf [file supp_gr.230250.117_Supplemental_Fig_S2.pdf]

**Supplemental Fig S2. Z-score for duplicate array screens and the list of candidate genes.** (A) Z score for each gene was plotted on the x-axis (exp 1) and y-axis (exp 2). Yellow box denotes candidate genes (red circles) that showed decreased CVB3 infection after gene knockout. (B) List of 10 candidate genes of which 8 genes were confirmed by a secondary screen are indicated in grey background.

**a**

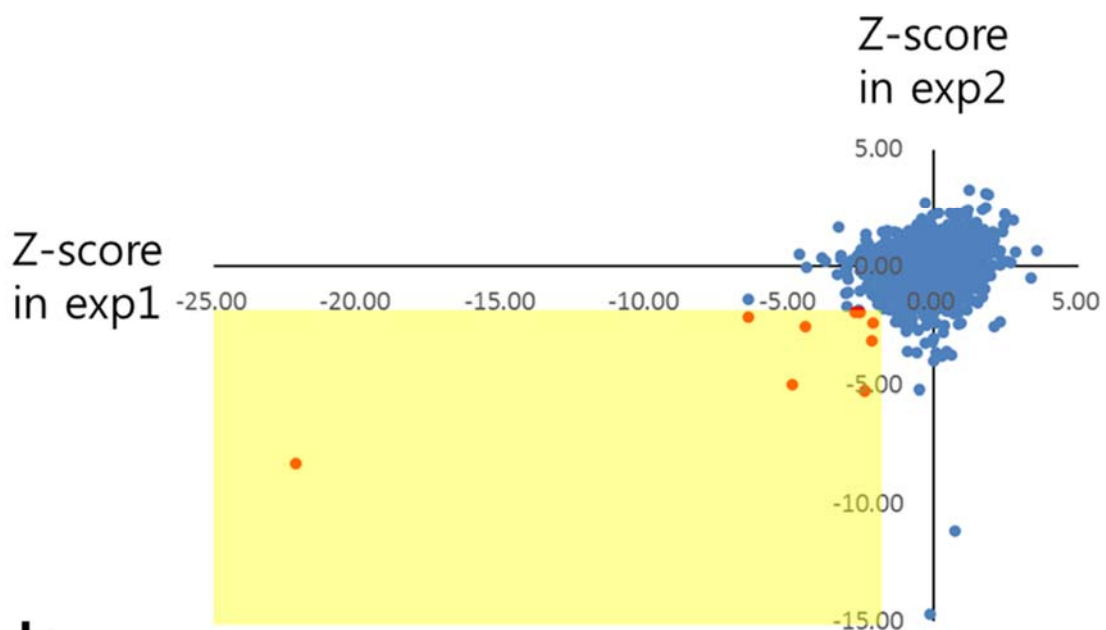

**b**

| List of 10 candidate genes |                                           |
|----------------------------|-------------------------------------------|
| Gene                       | Full Name                                 |
| <i>DNM2</i>                | dynamain 2                                |
| <i>RACK1</i>               | receptor for activated C kinase 1         |
| <i>GRB2</i>                | growth factor receptor bound protein 2    |
| <i>ADCY8</i>               | adenylate cyclase 8                       |
| <i>FASN</i>                | fatty acid synthase                       |
| <i>CSDE1</i>               | cold shock domain containing E1           |
| <i>NCK2</i>                | NCK adaptor protein 2                     |
| <i>SACM1L</i>              | SAC1 suppressor of actin mutations 1 like |
| <i>OSBP</i>                | oxysterol binding protein                 |
| <i>ACBD3</i>               | acyl-CoA binding domain containing 3      |
