# Supplementary material for: Arrayed CRISPR screen with image-based assay reliably uncovers host genes required for coxsackievirus infection
Source: PubMed Central journal article supplement — Genome Res. 2018 Jun;28(6):859–68. doi: 10.1101/gr.230250.117 (PMC5991512; doi:10.1101/gr.230250.117), 2018-06

**Supplemental Fig S4. Cell viability after treatment with three chemical inhibitors.** Cells were treated with the indicated concentrations of three chemical inhibitors for 2 days and cell viability was measured by MTT assay.

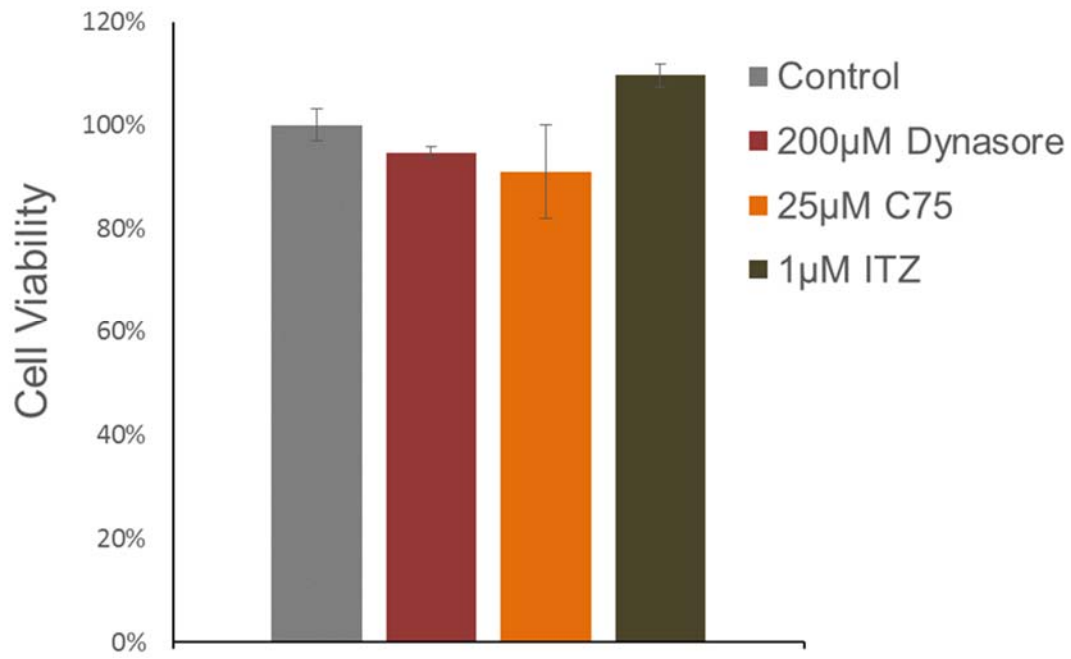

Supplement: supp_gr.230250.117_Supplemental_Fig_S4.pdf [file supp_gr.230250.117_Supplemental_Fig_S4.pdf]
