# Supplementary material for: Arrayed CRISPR screen with image-based assay reliably uncovers host genes required for coxsackievirus infection
Source: PubMed Central journal article supplement — Genome Res. 2018 Jun;28(6):859–68. doi: 10.1101/gr.230250.117 (PMC5991512; doi:10.1101/gr.230250.117), 2018-06

**Supplemental Fig S5. No CVB3-resistant colonies were formed after transfection with sgRNAs targeting *DNM2*, *FASN*, and *OSBP* genes.** CVB3 infection was performed after transfection with plasmids encoding Cas9 and sgRNAs targeting *DNM2*, *FASN*, and *OSBP*. No surviving colony was detected.

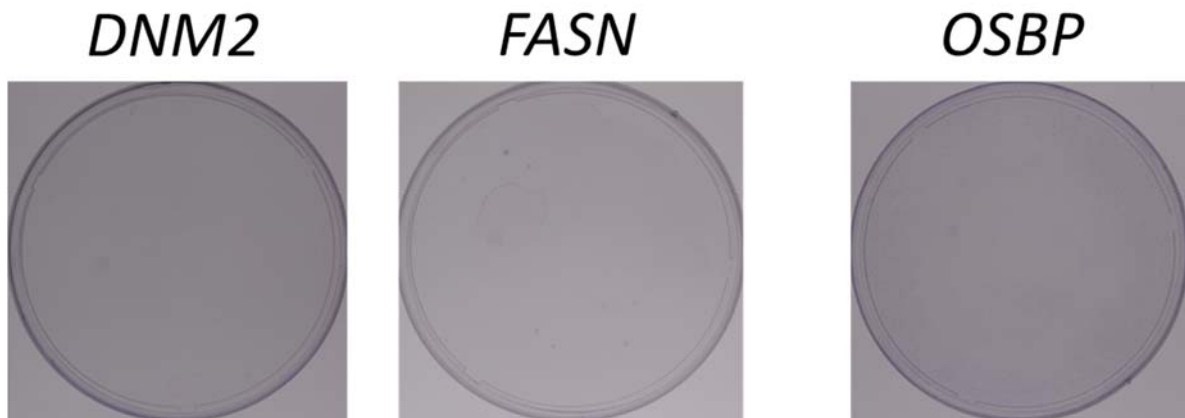

Supplement: supp_gr.230250.117_Supplemental_Fig_S5.pdf [file supp_gr.230250.117_Supplemental_Fig_S5.pdf]
