# Supplementary material for: Arrayed CRISPR screen with image-based assay reliably uncovers host genes required for coxsackievirus infection
Source: PubMed Central journal article supplement — Genome Res. 2018 Jun;28(6):859–68. doi: 10.1101/gr.230250.117 (PMC5991512; doi:10.1101/gr.230250.117), 2018-06

**Supplemental Fig S7. Western blot analysis of the CVB3 infection in *ACBD3* knockout cells.** After CVB3 infection, cells were lysed for immunoblot analysis using an anti-*ACBD3* antibody, anti-3C antibody, anti-VP1 antibody, and anti-beta actin antibody.

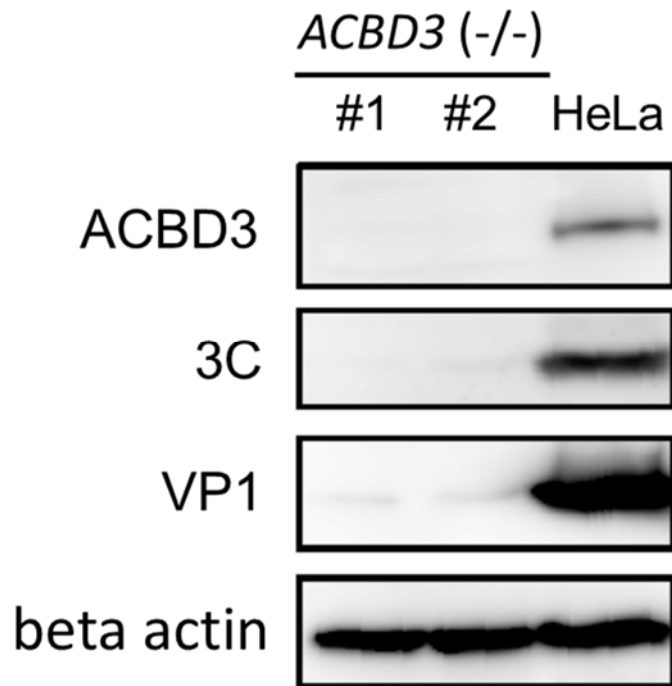

Supplement: supp_gr.230250.117_Supplemental_Fig_S7.pdf [file supp_gr.230250.117_Supplemental_Fig_S7.pdf]
