# Supplementary material for: Arrayed CRISPR screen with image-based assay reliably uncovers host genes required for coxsackievirus infection
Source: PubMed Central journal article supplement — Genome Res. 2018 Jun;28(6):859–68. doi: 10.1101/gr.230250.117 (PMC5991512; doi:10.1101/gr.230250.117), 2018-06

**Supplemental Fig S8. Rescue of viral protein expression after transfection with a plasmid encoding FLAG-tagged ACBD3 protein in ACBD3 knockout (KO) cells.** Plasmid encoding FLAG-tagged ACBD3 protein was transfected into ACBD3 KO cells and WT HeLa cells and the cells were then infected with CVB at 5 MOI. At 8 h post-infection, cells were harvested and lysed for immunoblot analysis using the anti-ACBD3 antibody, anti-3C antibody, anti-VP1 antibody, anti-FLAG antibody, and anti-beta-actin antibody. Expression of FLAG-tagged ACBD3 protein rescued the viral protein expression in the ACBD3 KO cells.

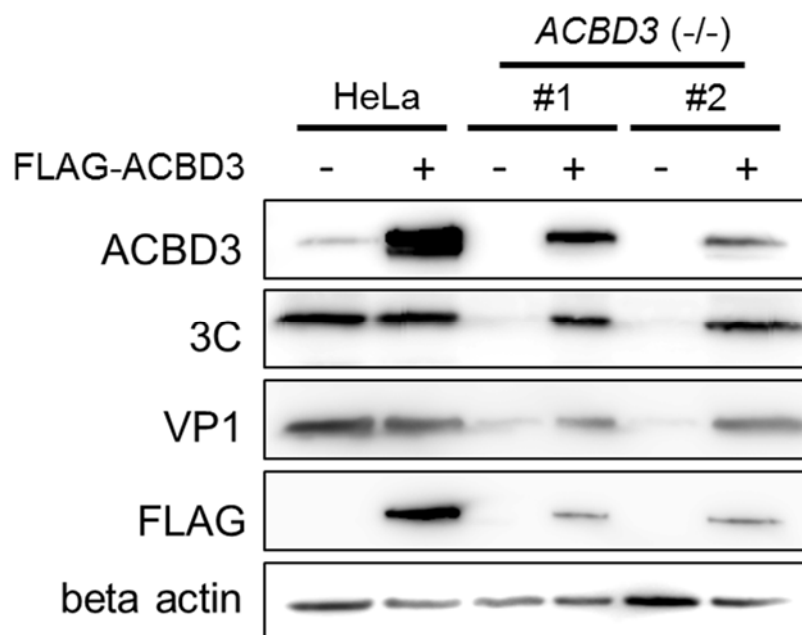

Supplement: supp_gr.230250.117_Supplemental_Fig_S8.pdf [file supp_gr.230250.117_Supplemental_Fig_S8.pdf]
