# Supplementary material for: Arrayed CRISPR screen with image-based assay reliably uncovers host genes required for coxsackievirus infection
Source: PubMed Central journal article supplement — Genome Res. 2018 Jun;28(6):859–68. doi: 10.1101/gr.230250.117 (PMC5991512; doi:10.1101/gr.230250.117), 2018-06

**Supplemental Fig S9. siRNA targeting *ACBD3* does not inhibit host cell death and CVB3 replication.** (A) Viability of cells transfected with control and *ACBD3* siRNAs after CVB3 infection. (B) Viral replication assay of cells transfected with control and *ACBD3* siRNAs using a CVB3 replicon.

**a**

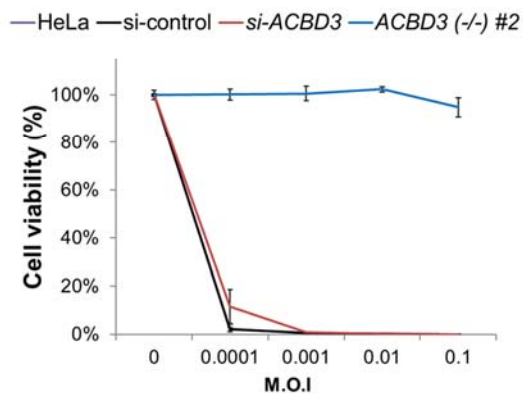

**b**

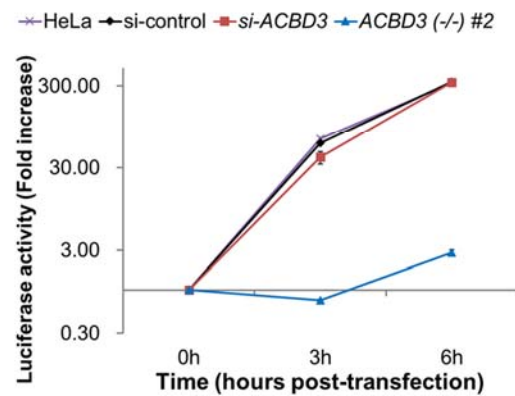

Supplement: supp_gr.230250.117_Supplemental_Fig_S9.pdf [file supp_gr.230250.117_Supplemental_Fig_S9.pdf]
