# Supplementary material for: Arrayed CRISPR screen with image-based assay reliably uncovers host genes required for coxsackievirus infection
Source: PubMed Central journal article supplement — Genome Res. 2018 Jun;28(6):859–68. doi: 10.1101/gr.230250.117 (PMC5991512; doi:10.1101/gr.230250.117), 2018-06

**Supplemental Fig S10. RACK1 sgRNA shows stronger inhibition of CVB3 infection. (A)**

HeLa cells were transiently transfected with siRNA and sgRNA targeting *RACK1*. Cells were infected with CVB3, fixed, and stained. Infection rate was shown as mean  $\pm$  s.e.m for triplicate experiments. (B) (C) Cells were transiently transfected with *RACK1* siRNA or sgRNA and the expression level of RACK1 protein was measured by western blot analysis.

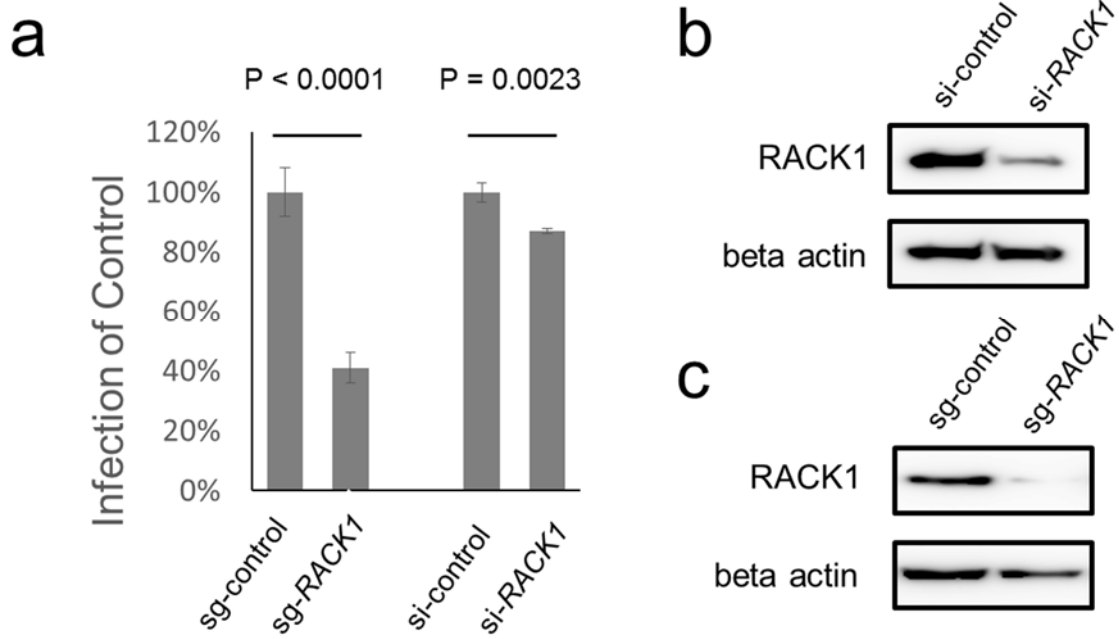

Supplement: supp_gr.230250.117_Supplemental_Fig_S10.pdf [file supp_gr.230250.117_Supplemental_Fig_S10.pdf]
