# Supplementary material for: Arrayed CRISPR screen with image-based assay reliably uncovers host genes required for coxsackievirus infection
Source: HighWire-hosted journal article supplement (doi:10.1101/gr.230250.117), 2018-04-30

**Supplemental Fig S3. Pooled screen for CVB3 resistance using focused library.** A lentivirus-based pooled focused sgRNA screen (pooling 4,542 sgRNAs) was conducted. Sequencing analysis of surviving cells. Each circle represents a gene. The y axis indicates the MAGeCK gene score. Genes were randomly distributed on the x-axis. Red colored circle indicates the enriched *CXADR* gene. Purple colored circles indicate eight gene hits in the arrayed screen in the order, *ACBD3*, *ADCY8*, *CSDE1*, *DNM2*, *FASN*, *RACK1*, *OSBP*, and *SACM1L*. *CXADR* was the only gene with false discovery rate (FDR) under 10%.

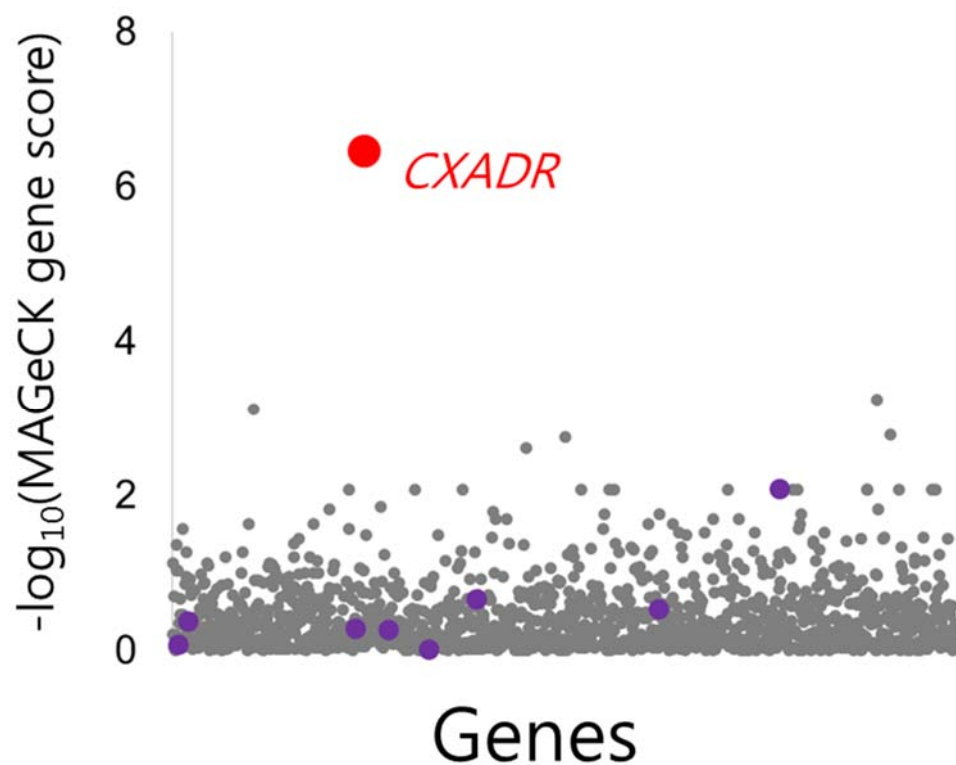

Supplement: Supplemental_Fig_S3.pdf [file Supplemental_Fig_S3.pdf]
