# Supplementary material for: Arrayed CRISPR screen with image-based assay reliably uncovers host genes required for coxsackievirus infection
Source: HighWire-hosted journal article supplement (doi:10.1101/gr.230250.117), 2018-04-30

**Supplemental Fig S6. Immunostaining of CVB3 infection in *CSDE1* KO cells.** After CVB3 infection, cells were fixed and stained with an anti-3C antibody (green) and DAPI (blue).

HeLa

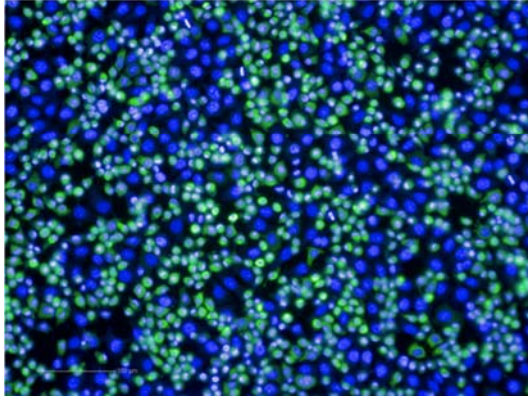

*CSDE1* (- / -)

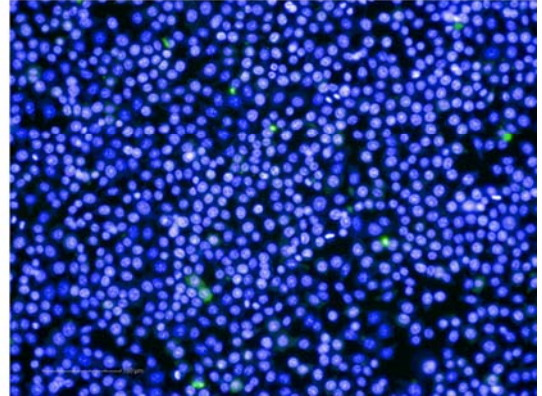

Supplement: Supplemental_Fig_S6.pdf [file Supplemental_Fig_S6.pdf]
