# Supplementary material for: Arrayed CRISPR screen with image-based assay reliably uncovers host genes required for coxsackievirus infection
Source: HighWire-hosted journal article supplement (doi:10.1101/gr.230250.117), 2018-04-30

**Supplemental Fig S11. Indel frequencies at *ACBD3* and *CSDE1* on-target and potential off-target sites in HeLa cells.** Indel frequencies were detected by NGS. Value under 0.001% is not indicated on the graph. The values are the mean  $\pm$  S.D for duplicate experiments. \*\*  $P < 0.001$ .

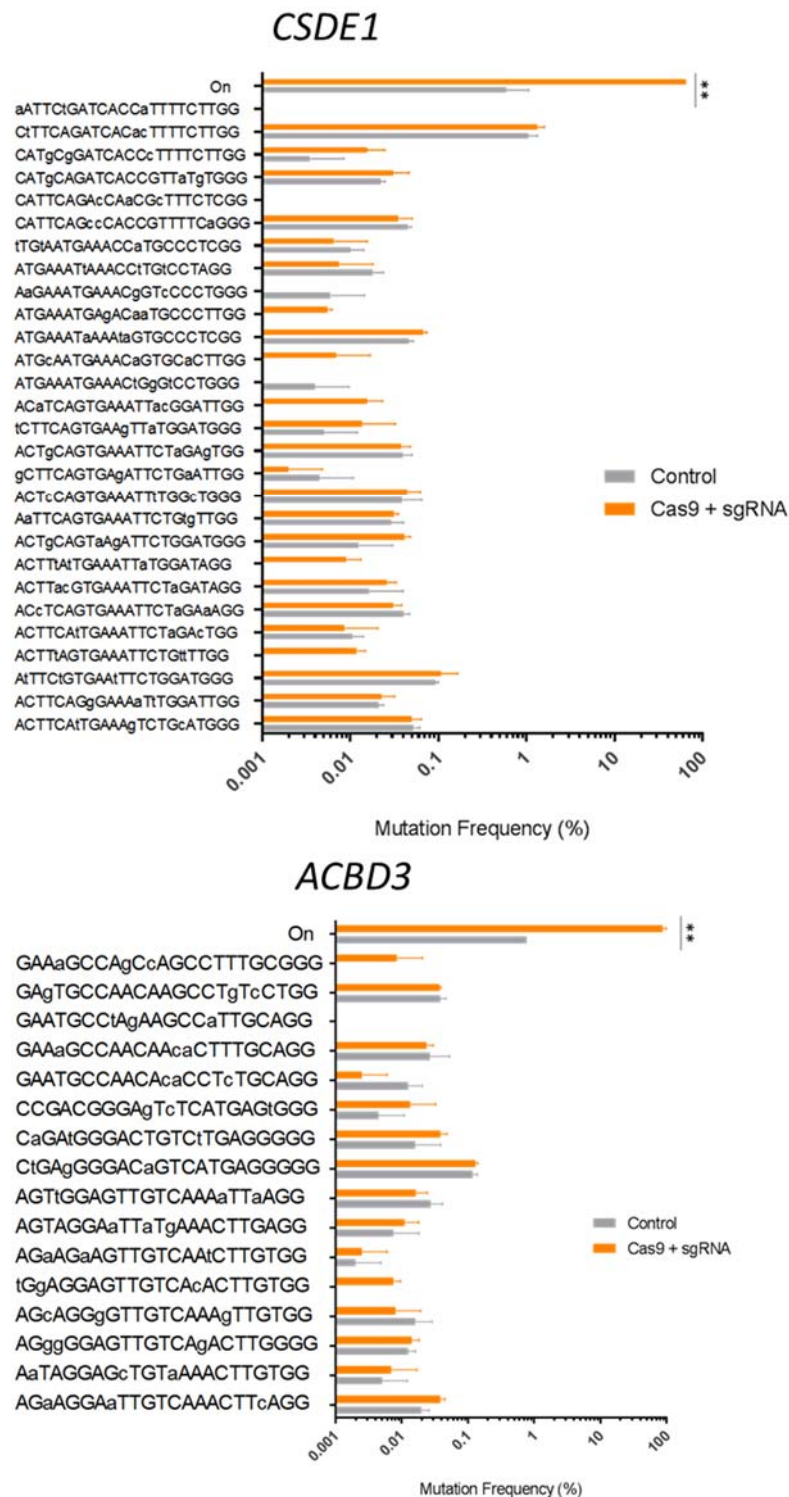

Supplement: Supplemental_Fig_S11.pdf [file Supplemental_Fig_S11.pdf]
